# Supplementary material for: Number of Persistent Organic Pollutants Detected at High Concentrations in Blood Samples of the United States Population
Source: PubMed Central journal article supplement (PMC4979965; doi:10.1371/journal.pone.0160432), 2016-08-10
Supplement: pone.0160432.s001.pdf [file pone.0160432.s001.pdf]

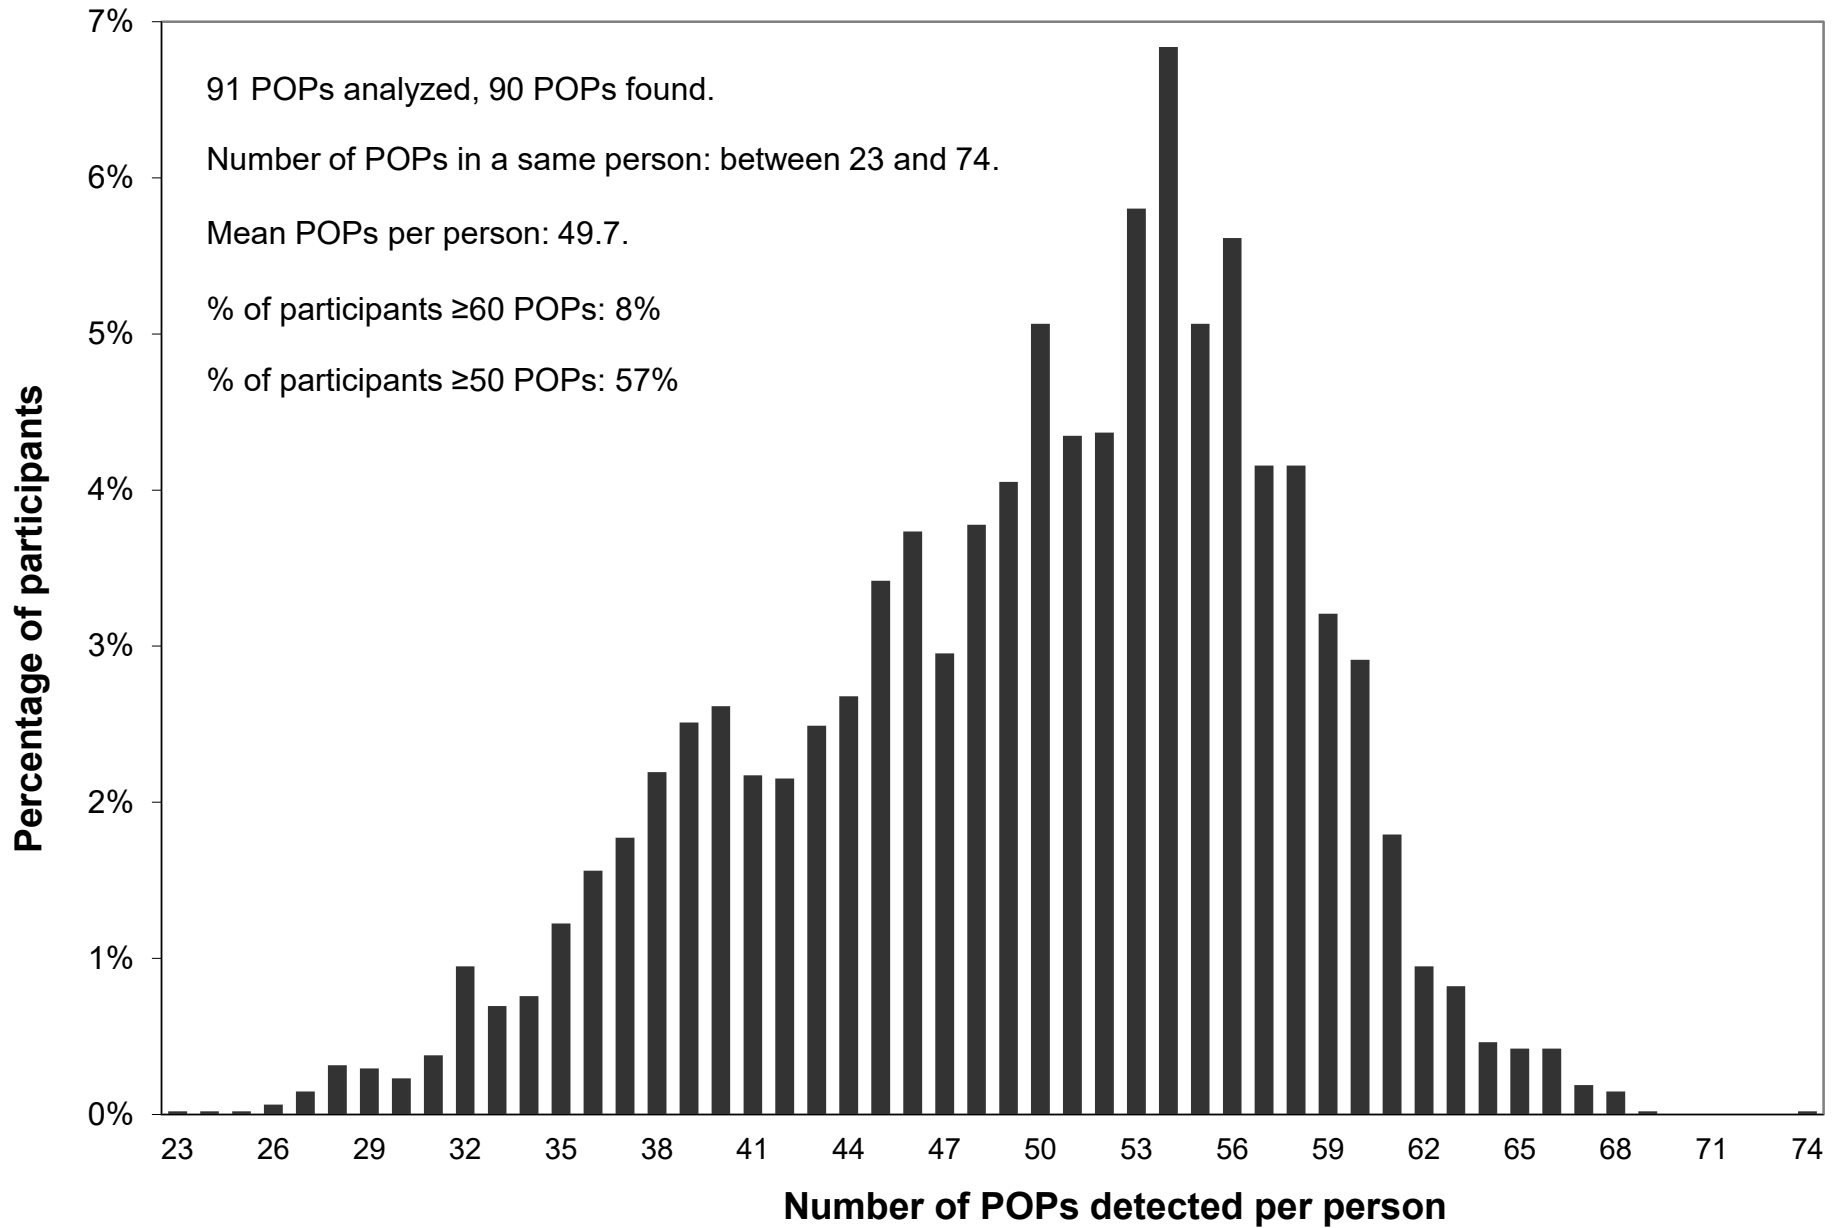

**S1 Figure. Percentage of participants according to number of POPs detected per person.**  
 (91 POPs analyzed, n = 4,739)
